# Supplementary material for: Chemical hybridization of sulfasalazine and dihydroartemisinin promotes brain tumor cell death
Source: PubMed Central journal article supplement (PMC8531376; doi:10.1038/s41598-021-99960-z), 2021-10-21
Supplement: 41598_2021_99960_MOESM1_ESM.pdf [file 41598_2021_99960_MOESM1_ESM.pdf]

# Supporting Information

## Chemical Hybridization of Sulfasalazine and Dihydroartemisinin Promotes Brain Tumor Cell Death

Annemarie Ackermann<sup>1</sup>, Aysun Çapcı<sup>2</sup>, Michael Buchfelder<sup>3</sup>,  
Svetlana B. Tsogoeva<sup>2,\*</sup> and Nicolai Savaskan<sup>1,3,4,\*</sup>

<sup>1</sup>Translational Cell Biology & Neurooncology Lab, Department of Neurosurgery, Universitätsklinikum Medical School Erlangen, Friedrich Alexander University of Erlangen – Nürnberg (FAU), Erlangen, Germany; <sup>2</sup>Organic Chemistry Chair I and Interdisciplinary Center for Molecular Materials (ICMM), Friedrich-Alexander University of Erlangen-Nürnberg, Nikolaus Fiebiger-Straße 10, 91058 Erlangen, Germany; <sup>3</sup>Department of Neurosurgery, Universitätsklinikum Medical School Erlangen, Friedrich Alexander University of Erlangen – Nürnberg (FAU), Erlangen, Germany; <sup>4</sup>BiMECON Ent. Berlin, Germany

**Table 1S.** Properties of investigated parent compounds and hybrid **AC254**.

| Compound           | Molecular Formula                                               | MW (g/mol) | Melting Point             | Rf <sup>[c]</sup> | Color                    | Purity <sup>[d]</sup> |
|--------------------|-----------------------------------------------------------------|------------|---------------------------|-------------------|--------------------------|-----------------------|
| Dihydroartemisinin | C <sub>27</sub> H <sub>29</sub> NO <sub>11</sub>                | 284.35     | 164-165 °C <sup>[a]</sup> | 0.46              | White crystalline powder | +                     |
| <b>AC254</b>       | C <sub>33</sub> H <sub>36</sub> N <sub>4</sub> O <sub>9</sub> S | 664.73     | 148-150 °C                | 0.24              | Yellow powder            | +                     |
| <b>SAS</b>         | C <sub>18</sub> H <sub>15</sub> N <sub>4</sub> O <sub>5</sub> S | 398.39     | 220 °C <sup>[b]</sup>     | -                 | Yellow powder            | +                     |

<sup>[a]</sup> Ref. 1. <sup>[b]</sup> Ref. 2 <sup>[c]</sup> R<sub>f</sub> values were determined in the solvent mixture of hexane : ethylacetate (6:4) <sup>[d]</sup> DHA and SSZ were commercially supplied > 95 grade. Purity of hybrid was confirmed by Elemental Analysis.

1. National Center for Biotechnology Information. PubChem Compound Summary for CID 3000518. <https://pubchem.ncbi.nlm.nih.gov/compound/3000518>. Accessed Sept. 11, 2020.
2. National Center for Biotechnology Information. PubChem Compound Summary for CID 5339, Sulfasalazine. <https://pubchem.ncbi.nlm.nih.gov/compound/Sulfasalazine>. Accessed Sept. 11, 2020.
